# Supplementary material for: In situ synthesis of well crystallized rhodium sulfide/carbon composite nanospheres as catalyst for hydrochloric acid electrolysis
Source: Royal Society of Chemistry journal article supplement (doi:10.1039/c3ta13941g), 2013-11-06
Supplement: c3ta13941g.pdf [file c3ta13941g.pdf]

## Supporting information

In situ synthesis of well crystallized rhodium sulfide/carbon composite  
nanospheres as catalyst for hydrochloric acid electrolysis

Yanjuan Li<sup>a</sup>, Nan Li<sup>a, \*</sup>, Kazumichi Yanagisawa<sup>b</sup>, Xiang Ding<sup>c</sup>, Xiaotian Li<sup>a</sup>

<sup>a</sup>College of Material Science and Engineering, Key Laboratory of Automobile  
Materials of Ministry of Education, Jilin University, 2699 Qianjin Street,  
Changchun, 130012, P. R. China.

<sup>b</sup>Research Laboratory of Hydrothermal Chemistry, Kochi University, Kochi  
780-8520, Japan

<sup>c</sup>Analysis and Testing Center, General Research Institute for Non-ferrous Metals,  
No.2 Xin Jie Kou Wai Str., Beijing, 100088, P. R. China

\*Corresponding author. Phone: +86 43185094856. Fax: +86 43185094856.

E-mail address: lin@jlu.edu.cn

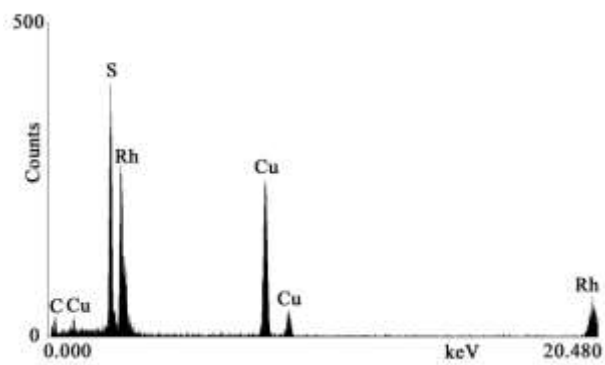

**Fig. S1** EDX pattern of Rh<sub>x</sub>S<sub>y</sub>/C nanocomposite synthesized in i-propanol with S/Rh = 2.25.

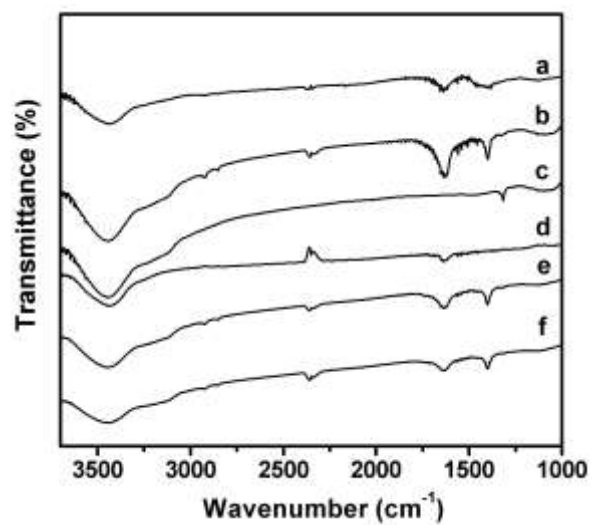

**Fig. S2** FTIR spectra of pure KBr (a) and rhodium sulfide/carbon composites synthesized in ethanol (b), i-propanol (c), i-amyl alcohol (d), n-butanol (e) and n-propanol (f).

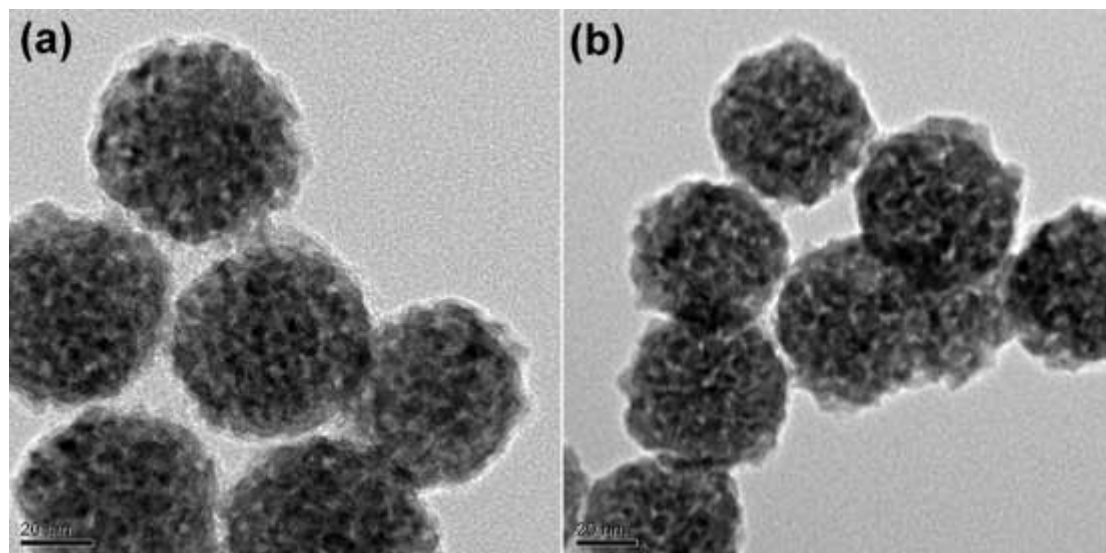

**Fig. S3** TEM images of  $\text{Rh}_x\text{S}_y/\text{C}$  nanocomposite synthesized in i-propanol after refluxing in concentrated HCl (a) and aqua regia (b) for 12h.

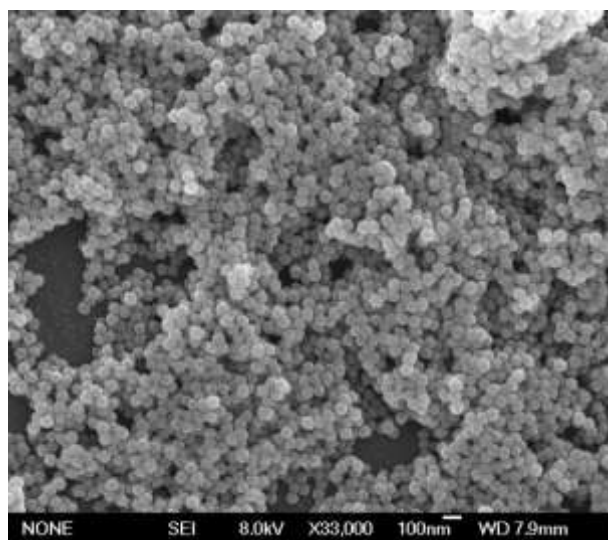

**Fig. S4** SEM image of Rh<sub>x</sub>S<sub>y</sub>/C nanocomposite synthesized in i-propanol after heat-treatment at 600 °C in Ar.

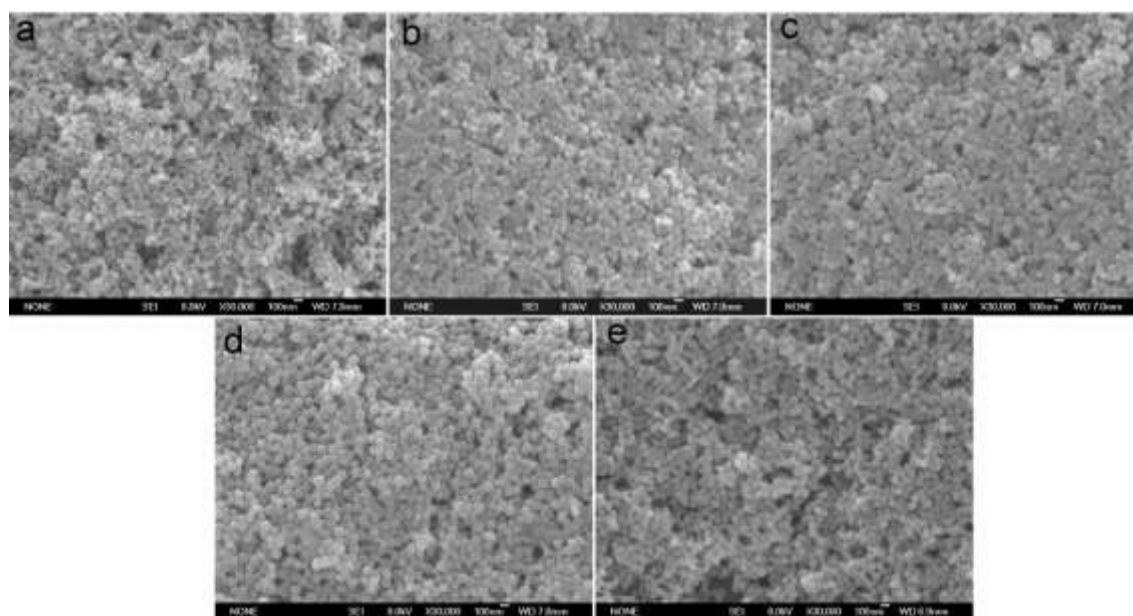

**Fig. S5** Representative SEM images of  $Rh_xS_y/C$  nanocomposites synthesized in various alcohols. (a-e) are ethanol, n-propanol, n-butanol, i-butanol, and i-amyl alcohol, respectively.
